# Supplementary material for: Gender Differences in Medical Career Choices: A Mixed-Method Study on Factors Influencing Surgical vs. Conservative Decisions
Source: Research Square preprint supplement (doi:10.21203/rs.3.rs-7308963/v1), 2025-09-23
Supplement: Supplementary file 1 [file ae92ba174e73fdd141213d04.docx]

**Appendix**

Questionnaire: Which factors in teaching and during medical studies influence the decision for a surgical or non-surgical specialty?

1. Gender

male – female – diverse

2. Age

x in years

3. Semester

7th – 8th – 9th – 10th

4. The following specialties are considered part of the surgical field:

General surgery, vascular surgery, cardiac surgery, paediatric surgery, thoracic surgery, visceral surgery, neurosurgery, trauma surgery and orthopaedics, plastic and aesthetic surgery, and oral and maxillofacial surgery.

The following specialties are considered part of the semi-surgical field:

ENT (ear, nose and throat), gynaecology and obstetrics, ophthalmology, dermatology, and urology.

A) Which direction are you currently most inclined to pursue for your specialty training?

- Surgical
- Semi-surgical
- Non-surgical

B) Which medical specialty are you currently most inclined to pursue?

[ Free text ]

5.

A) Did you already have your current specialty preference before starting medical school?

Yes – No

B) If "No": Which speciality did you intend to pursue before starting medical school?

(This question can also be answered with: “I didn’t know which specialty I wanted to pursue.”)

[ Free text ]

6. What is the one decisive reason for your current specialty preference?

(max. one sentence)

[ Free text ]

7. Which of the following factors positively influenced your specialty preference?

Multiple answers possible (max. 5)

- Theoretical lecture content
- Skills labs at TTU (e.g., suturing, physical examinations)
- Mandatory internship (e.g., block internship)
- Voluntary internship or self-selected clerkship
- Hope that the upcoming practical year will be decisive
- Anatomy dissection course during preclinical studies using human cadavers
- Elective course
- Tutorials
- Lecturers / instructors / physicians from the respective specialty
- Grades
- Individual career plans (e.g., possibility to work in private practice vs. hospital)
- Individual personal plans (e.g., family planning, place of residence)
- Own abilities / talents
- Statements / stories from others / “reputation” of the specialty
- Duration of specialty training
- Job security within the specialty
- Expected income
- Expected working hours
- Experiences prior to medical school: career orientation programs at school (BOGY), voluntary social year (FSJ), or equivalent

8. Which of the following factors negatively influenced your orientation process toward a specialty?

Multiple answers possible (max. 5)

- Theoretical lecture content
- Skills labs at TTU (e.g., suturing, physical examinations)
- Mandatory internship (e.g., block internship)
- Voluntary internship or self-selected clerkship
- Hope that the upcoming practical year will be decisive
- Anatomy dissection course during preclinical studies using human cadavers
- Elective course with surgical components
- Tutorials
- Lecturers / instructors / physicians from the respective specialty
- Grades
- Individual career plans (e.g., possibility to work in private practice vs. hospital)
- Individual personal plans (e.g., family planning, place of residence)
- Own abilities / talents
- Statements / stories from others / “reputation” of the specialty
- Duration of specialty training
- Job security within the specialty
- Expected income
- Expected working hours
- Experiences prior to medical school: career orientation programs at school (BOGY), voluntary social year (FSJ), or equivalent

9. To what extent was your specialty preference influenced by the COVID-19 pandemic?

- Strongly influenced, as contact restrictions limited practical training opportunities and clinical insights
- Partially influenced, although I was able to make up for lost experience through my own initiative after restrictions were lifted
- Slightly influenced, as only the preclinical phase was affected by COVID-19 measures
- Not influenced at all

10. To what extent do you perceive your intended specialty to be threatened by the rise of artificial intelligence (AI) in medicine?

Strongly – Moderately – Slightly – Not at all

11. Have you had or do you have personal role models in the medical field whom you look up to?

Multiple answers possible

- Yes – Personal acquaintances (e.g., family members, friends)
- Yes – Lecturers / instructors or doctors encountered in the hospital
- Yes – Other [Please specify in a single sentence]
- No

12. The following specialties are considered part of the surgical field:

General surgery, vascular surgery, cardiac surgery, paediatric surgery, thoracic surgery, visceral surgery, neurosurgery, trauma surgery and orthopaedics, plastic and aesthetic surgery, as well as oral and maxillofacial surgery.

How many clinical clerkships have you completed in a surgical specialty?

0 – x

13. The following specialties are considered part of the surgical field:

General surgery, vascular surgery, cardiac surgery, paediatric surgery, thoracic surgery, visceral surgery, neurosurgery, trauma surgery and orthopaedics, plastic and aesthetic surgery, as well as oral and maxillofacial surgery.

A) How many surgical internships (excluding clerkships) with exposure to the OR have you completed?

0 – x

B) If “> 0”: Did the surgical internship provide the insights you had hoped for?

Yes – Rather yes – Rather no – No

14. A) Have you ever had negative experiences as a student in the OR?

Yes – No

B) If “Yes”: Which of the following experiences have you had in the OR?

Multiple answers possible

- Patient died
- Disrespectful interactions between OR staff / poor atmosphere (e.g., between surgeon and OR nurses)
- Personally treated poorly or rudely by OR personnel
- Disrespectful comments about the anesthetized patient
- Feeling overwhelmed due to insufficient briefing or guidance
- Witnessed surgical errors by operating physicians or instructors
- Felt useless or out of place as a student in the OR
- Felt pressured by others or by yourself during surgical tasks (e.g., sutures had to look perfect)
- Experienced time pressure during surgical tasks
- Excessive influence of external factors (e.g., bureaucracy) on the surgical workflow
- Own physical difficulties in the OR (circulatory issues, fear of fainting)
- Other: [Please describe in one sentence]

15. A) How confident do you feel performing basic surgical skills (e.g., working sterile, suturing techniques, etc.)?

Very insecure 0 – 2 – 4 – 6 – 8 – 10 Very confident

B) In which areas of teaching do you see potential to improve the learning of surgical skills?

[ Free text ]

16. To what extent would you assign a key role to the anatomy dissection course during preclinical studies (if it took place in person, involving hands-on work on cadavers) in shaping your orientation toward surgical fields?

- Very important, as it is the first hands-on work on a human body
- Misleading impression, as it is difficult to compare to actual surgery
- Too early in the studies to have a lasting impact on specialty choice

17. Which of the following teaching measures could most increase your personal motivation to pursue a surgical specialty?

Multiple answers possible (max. 4)

- More scheduled internships in surgical specialties integrated into the curriculum
- More voluntary offers (elective courses, etc.)
- Preparatory seminars before surgical internships
- Digital supplementary materials (e.g., videos on OR behaviour, how to scrub in, etc.)
- Mandatory surgical clerkship
- More required hands-on training opportunities for surgical skills
- More visual material in lectures (e.g., surgery videos)
- More direct patient contact
- Earlier introduction to surgical subjects during studies (e.g., during the preclinical phase)
- The lecturers themselves (more empathy, enthusiasm for their specialty, etc.)
- Teaching measures cannot change my attitude toward surgical specialties
- Other: [Please describe in one sentence per point]

18. What is your opinion on actively adapting surgical teaching to recruit more female students, for example through career workshops or training sessions offered exclusively for women?

- A good idea – gender disparities in surgical fields need to be addressed
- In principle, I support more women in surgery, but not through targeted recruitment
- That is not necessary – everyone should find their specialty on their own
- Surgical education does not need to be adjusted – I see the issue more in the professional environment
- I don't care

19. The following specialties are considered part of the surgical field:

General surgery, vascular surgery, cardiac surgery, paediatric surgery, thoracic surgery, visceral surgery, neurosurgery, trauma surgery and orthopaedics, plastic and aesthetic surgery, and oral and maxillofacial surgery.

A) Would you consider surgical specialties to be “male-dominated” fields?

Yes – Rather yes – Rather no – No

B) If yes: Does the reputation of a specialty being “male-dominated” discourage you from choosing it?

Yes – Rather yes – Rather no – No

20. Would you classify the following specialties individually as “male-dominated” fields?

General surgery         Yes – No

Vascular surgery         Yes – No

Cardiac surgery         Yes – No

Paediatric surgery         Yes – No

Thoracic surgery         Yes – No

Visceral surgery         Yes – No

Neurosurgery           Yes – No

Trauma surgery and orthopaedics  Yes – No

Plastic and aesthetic surgery   Yes – No

Oral and maxillofacial surgery   Yes – No

21. Please indicate the extent to which you agree with the following statements:

Success in my career is essential for my future planning

- Strongly disagree 0 – 2 – 4 – 6 – 8 – 10 Strongly agree

Work-life balance is essential for my future planning

- Strongly disagree 0 – 2 – 4 – 6 – 8 – 10 Strongly agree

Family is more important to me in the future than my career

- Strongly disagree 0 – 2 – 4 – 6 – 8 – 10 Strongly agree

The reputation of my specialty within professional circles is important to me

- Strongly disagree 0 – 2 – 4 – 6 – 8 – 10 Strongly agree

The reputation of my specialty among the public is important to me

- Strongly disagree 0 – 2 – 4 – 6 – 8 – 10 Strongly agree

22. Has anyone from the medical field ever advised you against pursuing a career in surgery?

Yes – No

23. How strongly do you see the following personality traits in yourself?

self-confident ++ + 0 – –– self-doubting

organized ++ + 0 – –– disorganized

ambitious ++ + 0 – –– content

determined ++ + 0 – –– indecisive

competitive ++ + 0 – –– cooperative

practical ++ + 0 – –– theoretical

24. In order to be invited to an additional interview, you would need to agree to the de-anonymization of your data.

I agree – I do not agree
